RESEARCH ARTICLE

# Kinetic analysis suggests that malathion at low environmental exposures is not toxic to humans

Lawrence M. Schopfer<sup>1\*</sup>, Ozden Tacal<sup>2</sup>, Patrick Masson<sup>3</sup>, Oksana Lockridge<sup>1</sup>

**1** Eppley Institute, University of Nebraska Medical Center, Nebraska Medical Center, Omaha, Nebraska, United States of America, **2** Department of Biochemistry, School of Pharmacy, Hacettepe University, Ankara, Turkey, **3** Biochemical Neuropharmacology Laboratory, Kazan Federal University, Kazan, Russia

\* [lschopf@unmc.edu](mailto:lschopf@unmc.edu)

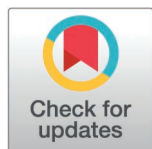

## OPEN ACCESS

**Citation:** Schopfer LM, Tacal O, Masson P, Lockridge O (2025) Kinetic analysis suggests that malathion at low environmental exposures is not toxic to humans. PLoS One 20(10): e0335361. <https://doi.org/10.1371/journal.pone.0335361>

**Editor:** Farooq Ahmed Wani, Al-Jouf University College of Medicine, SAUDI ARABIA

**Received:** April 11, 2025

**Accepted:** October 9, 2025

**Published:** October 24, 2025

**Copyright:** © 2025 Schopfer et al. This is an open access article distributed under the terms of the [Creative Commons Attribution License](https://creativecommons.org/licenses/by/4.0/), which permits unrestricted use, distribution, and reproduction in any medium, provided the original author and source are credited.

**Data availability statement:** All relevant data are within the manuscript.

**Funding:** OL received funding from the Fred and Pamela Buffett Cancer Center Support Grant #P30CA036727 URL = <https://reporter.nih.gov/search/dXbx5uvWSkqRxarLK3JtsA/project-details/10695234> The funders did

## Abstract

Malathion has the reputation of being a safe pesticide. There are no reported cases of cholinergic toxicity in people exposed to low environmental doses of malathion. Our goal was to explain the safety of malathion in terms of the mechanism of malathion detoxication. The structure of malathion includes a built-in safety feature, specifically two ethyl esters. The ethyl esters are decarboxylated by human esterases to negatively charged malathion which does not react with acetylcholinesterase. Acetylcholinesterase is the toxicologically relevant target for organophosphates such as malathion. A toxic form of malathion is produced by Cytochrome P450 enzymes which convert malathion to malaoxon. Malaoxon is toxic because it inhibits acetylcholinesterase. We used high pressure liquid chromatography on a Prodigy 5  $\mu$ m ODS column to monitor the production of enzyme-catalyzed decarboxylation of the malathion ethyl esters. The products of malathion decarboxylation were identified by mass spectrometry using a Thermo RSLC Ultimate 3000 ultra-high pressure chromatography system with a Thermo Easy-Spray PepMap RSLC C18 separation column attached to an Orbitrap Fusion Lumos Tribrid mass spectrometer. Decarboxylation and enzyme inhibition were assayed with recombinant human acetylcholinesterase (rHuAChE), human butyrylcholinesterase (HuBChE), and recombinant human liver carboxylesterase (rHuCE1). A trace contaminant in 98.5% pure malathion was identified by mass spectrometry. Consistent with the fact that negatively charged compounds are not inhibitors of HuAChE, HuBChE, or HuCE1, we found that negatively charged, decarboxylated malathion did not inhibit the activity of rHuAChE, HuBChE, or rHuCE1. Carboxylesterase detoxified malathion 100,000-fold faster compared to rHuAChE and HuBChE. Low dose exposures to malathion are not directly toxic. The toxic metabolite, malaoxon, is produced very slowly. By comparison, detoxified malathion acids are formed rapidly. In conclusion, our data suggest that the safety of low dose environmental exposures to malathion is explained by the fact that malathion is detoxified faster than it is activated to the toxic malaoxon. Our review of the literature finds no convincing evidence that low dose malathion exposure causes cancer.

not play any role in the study design, data collection and analysis, decision to publish, or preparation of the manuscript.

**Competing interests:** The authors have declared that no competing interests exist.

## Introduction

Malathion, also called Karbofos, is one of the most common organophosphothioate pesticides currently in use. The Environmental Protection Agency states that there is “no human health risks of concern from the registered uses of malathion” [1]. However, over the past 20 years, an increasing number of papers have appeared suggesting that malathion poses health risks. In particular, it was pointed out that the presence of impurities in preparations may enhance toxicity of malathion [2]. These studies use malathion concentrations well in excess of the levels encountered in the environment due to pest control. Unfortunately, too many researchers do not read papers that are over 20 years old, making the perception that malathion is toxic more commonly believed. It is time that this growing body of misleading data be refuted by re-emphasizing the safety of malathion. In the current work, we have reinvestigated some of the properties of malathion to re-emphasize its safety, have addressed some of the work that has called that safety into question, and have provided direct evidence that apparent inhibition of HuBChE by malathion is due to isomalathion contamination.

Malathion is applied by spraying which makes dermal absorption the principal route of contamination for people. Contamination by breathing the pesticide would be expected to occur, but the amount of malathion that is deposited on exposed skin is 20–1700 times the amount reaching the respiratory tract [3]. In addition, absorption of malathion through skin is poor. Only 1–8% of the applied amount is absorbed [3–7]. In contrast, 95% of malathion administered orally is absorbed [6]. The standard method for estimating the level of absorbed malathion is to measure the malathion metabolic products, mono- and dicarboxylic acids, in the urine [8]. Combining the percent absorption with the measured level of metabolites in urine, exposure of workers to malathion in the field can be estimated. It is found that typical exposures are 0.0046–1.1 mg/kg/day [4,6,9]. It is interesting to note that the LD50 for malathion in humans is 858 mg/kg [10], a value 3 orders of magnitude higher than environmental exposure levels.

In addition to the absorption safe-guard, malathion is subject to chemical safe-guards. First, organophosphorus compounds are toxic because they inhibit acetylcholinesterase. Malathion does not react directly with acetylcholinesterase. In order to become toxic, malathion must be oxidized to malaaxon by cytochrome P450. The P450 isozyme CYP2C19 has the highest affinity and fastest Vmax for oxidative desulfuration of malathion. The apparent second order rate constant for human liver microsomal CYP2C19 (Vmax/Km) is 0.040 nmol/(min\_mg protein\_μM) [11]. Second, malathion is detoxified by carboxylesterase mediated decarboxylation that converts neutral malathion to negatively charged malathion monocarboxylic and dicarboxylic acids [12–14]. These negatively charged metabolites are poor inhibitors of acetylcholinesterase [13]. The apparent second order rate constant for decarboxylation by human liver microsomal carboxylesterase is 30 nmol/(min\_mg protein\_μM) [13]. This makes hydrolytic inactivation of malathion by carboxylesterase 750-fold faster than cytochrome P450 activation, strongly favoring inactivation over activation.

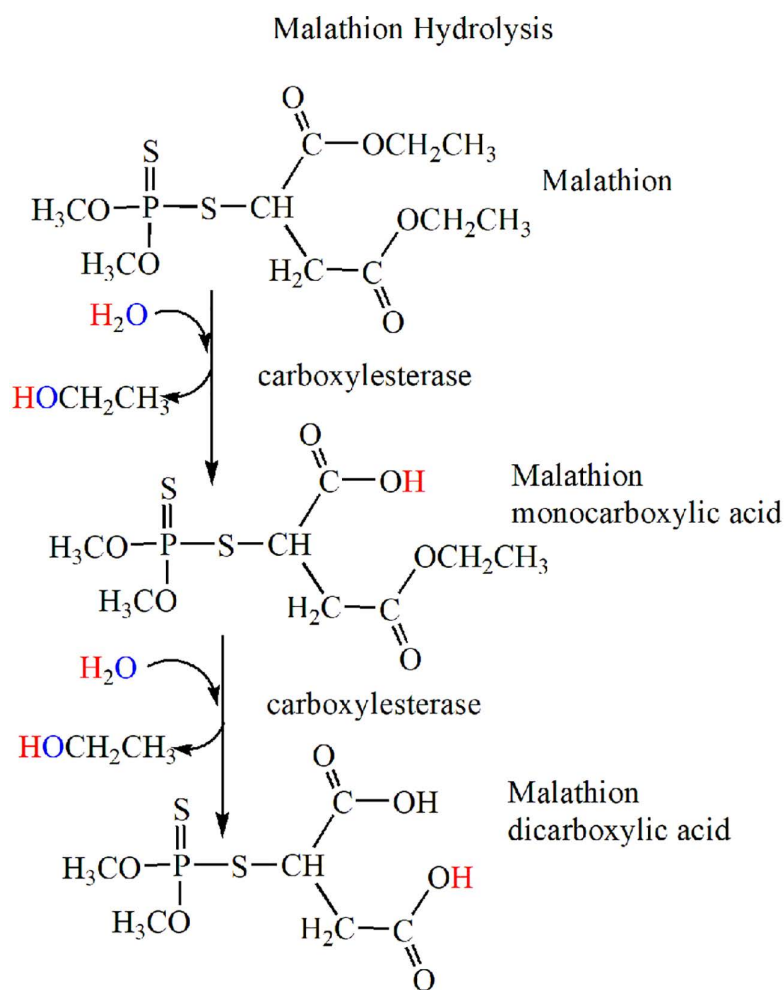

**Fig 1. Steps in the hydrolysis of the ethyl esters of malathion to nontoxic acids.** Carboxylesterase de-esterifies malathion in two-steps. The mono-carboxylic acid and the dicarboxylic acid are nontoxic.

<https://doi.org/10.1371/journal.pone.0335361.g001>

The relevant reactions in malathion ethyl-ester hydrolysis are shown in Fig 1.

In view of the low levels of malathion absorption and the preference for inactivation over activation it is not surprising that reports of adverse effects from environmental exposure to malathion are rare. The following information was taken from the EPA Review of Malathion Incident Reports [15]. The National Pesticide Telecommunications Network received 95 reports of adverse health effects from exposure to malathion between 1984 and 1991. The Poison Control Centers received 10,637 reports on malathion cases between 1985 and 1992. There were 679 occupational exposures, 6357 adult non-occupational exposures, and 3601 child exposures. Of the 28 organophosphate pesticides and carbamates included in the reports, malathion had the 6<sup>th</sup> highest ratio of poisonings to applications. During widespread spraying of malathion in Los Angeles county between 1982–1995, 539 reports of malathion exposure were received from the general population [California Department of Food and Agriculture was operating between 1982–1990 and California Department of Pesticide Regulation was operating between 1991–1995]. There were 510 reports of malathion poisoning from farm workers and 330 reports from pesticide handlers between 1982 and 1989 [California Department of Food and Agriculture]. The majority of these incidents involved minor symptoms such as headache, eye irritation, skin rash, nausea, and upper respiratory

irritation which in many cases may have been a reaction to the odor of the spray. There were no reports of cholinergic toxicity from malathion at low environmental doses.

More recently, effort has turned toward finding a connection between malathion and cancer. Overall, there appears to be little evidence for a connection between malathion and cancer. The Office of Chemical Safety and Pollution Prevention in the Environmental Protection Agency cautioned that positive reports of genotoxicity in the literature should be interpreted with care. They reported that there was “suggestive evidence of carcinogenicity [for malathion] but not sufficient to assess human carcinogenic potential” [16]. Epidemiologic studies on the likelihood of farmers getting cancer from exposure to malathion were often contradictory and at best indicated a low increase in probability. For example, data from the British Columbia Cancer Registry indicated a 1.3-fold increased likelihood for prostate cancer [17]; data from the Agricultural Health Study, Iowa and North Carolina cohort indicated no association between malathion and increased risk for melanoma, bladder cancer, kidney cancer, colorectal cancer or prostate cancer [18]; data from the Agricultural Health Study, Iowa and North Carolina cohort indicated that women whose husbands used malathion had a 1.5 increased likelihood for breast cancer [19,20]; data from the Canadian Provincial Cancer Registries indicated that farmers had a 1.8-fold increased likelihood for non-Hodgkin’s lymphoma [20]; another study using data from the Agricultural Health Study, Iowa and North Carolina cohort indicated that farmers had a 2.04-fold increased likelihood for thyroid cancer and a 0.64-fold decreased likelihood for non-Hodgkin’s lymphoma [21]. Alavanja & Bonner reviewed occupational pesticide exposure and links to cancer and concluded that “Most pesticides have not been found to be associated with cancer in epidemiologic studies.” and “In the United States and other developed countries farmers experience a lower mortality and cancer incidence rate compared to the general population” [22,23].

Studies on rats were undertaken to identify potential risks of malathion exposure for people. Investigators found that intraperitoneal injection of 100 or 150 mg/kg malathion once-a-day for 28 days caused DNA damage in the rat hippocampus [23], and that intraperitoneal injection of 170 mg/kg malathion twice-a-day for 5 days induced adenocarcinoma in the rat mammary gland [24]. Both studies identified potential cancer risks from malathion. However, the dosage given to the rats in these studies is more than 100-fold higher than that experienced by people during environmental exposure.

Additional studies with cultured cells were performed to identify cancer risks. The results were inconsistent and suffered from the use of malathion at levels well above those expected from environmental exposure. The following are examples of studies that made a connection between malathion and cancer only when malathion doses were higher than environmental exposure doses. An environmental exposure dose would be a single dose of 0.02 to 46  $\mu\text{M}$  malathion. Culturing human lymphocytes in the presence of 50  $\mu\text{g}/\text{ml}$  malathion (0.15 mM) resulted in the up-regulation of 659 genes and the down-regulation of 3729 genes. Of these 57 genes were associated with cancer [25]. Culturing human mammary cells in the presence of 50  $\mu\text{g}/\text{ml}$  malathion caused changes in gene frequency [26]. Culturing human mononuclear cells in the presence of phytohemagglutinin and 200  $\mu\text{M}$  malathion for 24 hours resulted in breaks in gene KMT2A, a gene that is associated with hematological malignancies [27]. Culturing human T-lymphocytes in the presence of 0.09–1.8 mM malathion resulted in no increase in mutational frequency [10]. Culturing human peripheral lymphocytes in the presence of 25, 75, or 200  $\mu\text{M}$  malathion caused no DNA damage.

In summary, there is no convincing evidence for a correlation between environmental exposure to malathion and cancer or any toxic symptoms. Most of the cancer associations were seen at supra-environmental doses.

## Materials and methods

### Materials

Human plasma butyrylcholinesterase (HuBChE) was purified from Cohn fraction IV-4 by affinity chromatography on Hupresin [28]. Pure HuBChE consists of 4 identical subunits, each with a molecular weight of 85 kDa. The specific activity of the pure tetramer is 500 unit/mg [28]. Units of activity for HuBChE and rHuAChE are  $\mu\text{moles per min at pH}$

7, 25°C, where the substrate for HuBChE is 1 mM butyrylthiocholine and for rHuAChE is 1 mM acetylthiocholine. The thiocholine reaction product is detected by the yellow color of the product (5-thio-2-nitrobenzoic acid) resulting from 5,5' dithio-bis-2-nitrobenzoic acid reduction by thiocholine at 412 nm,  $E_{412\text{nm}} = 13,000 \text{ M}^{-1}\text{cm}^{-1}$  [29]. One unit of HuBChE activity corresponds to 2 µg HuBChE protein and  $23.5 \times 10^{-12}$  moles of active sites [28]. Pure recombinant human carboxylesterase (rHuCE1) was a kind gift from Dr. Philip Potter [30]. Units of activity for rHuCE1 are µmoles p-nitrophenyl acetate hydrolyzed per min at 25°C, where the substrate is 5 µM p-nitrophenyl acetate, the buffer is 1% Triton X-100 in 20 mM TrisCl pH 7.5, and the yellow p-nitrophenol product is monitored at 400 nm,  $E_{400\text{nm}} = 9000 \text{ M}^{-1}\text{cm}^{-1}$ . Pure human recombinant acetylcholinesterase (rHuAChE) without a Histidine tag was expressed in Chinese Hamster Ovary cells and purified by affinity chromatography on Procainamide-Sepharose [31]. Malathion (cat # N121346, 98.5% pure), isomalathion (cat# MET-12346AJ1, 88% pure), and malaoxon (cat # MET-12346C, 91.5% pure) were from Chem Services (West Chester, PA). Malathion alpha monocarboxylic acid (cat # M111015, >95% pure) and malathion beta monocarboxylic acid (cat # M111020, 94% pure) were from Toronto Research Chemicals Inc (Ontario, Canada). Malathion dicarboxylic acid (cat # DRE-C14713000, Ehrenstorfer standard, 99.0% pure) was from VHG Labs (Manchester, NH). Butyrylthiocholine (cat # 20850, >99% pure) was from Fluka/Honeywell Research Chemicals (Morris Plains, NJ). Acetylthiocholine (cat# 5751, >98% pure), 5,5'dithio-bis-2-nitrobenzoic acid (cat # D8130), and pepsin (cat #6887, porcine gastric mucosa) were from Sigma-Aldrich (St Louis, MO). Trifluoroacetic acid (cat # 29004, sequencing grade) was from Beckman (Indianapolis, IN). Formic acid (cat # A117, 25% solution, Optima LC/MS) and acetonitrile (cat# 11700, synthesis grade) were from Fisher Scientific (Lenexa, KS). Pierce C-18 spin column (cat #89870) was from Thermo Scientific (Waltham, MA). Ultrafree 0.22 µm Durapore centrifugal filter units (UFC30GV0S) were from Merck Millipore (Burlington, MA).

### **Inhibition of HuBChE by malathion measured in a Gilford spectrophotometer at 25°C**

A 260 µl reaction mixture containing 3.9 units (91.7 moles = 0.35 µM) HuBChE and 0.011 to 126 mM malathion in 0.1 M potassium phosphate pH 7.0, was incubated at room temperature. The enzyme activity was confirmed before the assay. At times between 1 and 250 minutes, a 20 µl aliquot of the reaction mixture was transferred to 2 ml of 0.1 M potassium phosphate buffer pH 7.0 containing 1 mM butyrylthiocholine and 0.5 mM 5,5'-dithio-bis-2-nitrobenzoic acid. The residual HuBChE activity was measured at 412 nm (the Ellman assay) [29]. The 100-fold dilution of the reaction mixture into buffer containing 1 mM butyrylthiocholine was sufficient to displace non-covalently bound malathion. Assays were repeated 3-times and average values were used.

### **Liquid chromatography tandem Mass spectrometry of the malathion/HuBChE adduct**

The following experiment was performed to distinguish between inhibition by malathion and inhibition by a contaminant in the malathion preparation. A 100 µl reaction mixture contained 34 units/ml HuBChE (0.8 µM) and 3.7 mM malathion in 50 mM ammonium bicarbonate pH 8. After incubation at room temperature for 17 hours in the dark, 52% of the HuBChE activity remained. Control samples without added malathion retained 100% activity.

Organophosphate irreversible inhibition is due to formation of a covalent adduct on the active site serine (S198) of HuBChE [32]. Digestion of HuBChE with pepsin according to the method of Fidler et al, yields short active site peptides suitable for mass spectrometry analysis [32].

The malathion-inhibited HuBChE solution was adjusted to pH 2 with 1 µl of 25% trifluoroacetic acid. A 2 mg/ml pepsin solution in 5% formic acid was prepared immediately before use. The HuBChE solution was incubated with 6 µg pepsin for 2 hours, at room temperature, in the dark. The digest was dried in a SpeedVac, redissolved in 2% acetonitrile plus 0.1% formic acid, and the peptides purified on a Pierce C-18 spin column (cat# 89870, Thermo Scientific, Rockford, IL) according to the manufacturer's instructions. The C-18 purified peptides were dried and redissolved in 20 µl of 2% acetonitrile plus 0.1% formic acid to give 4 µM peptides.



Peptides were analyzed by liquid chromatography tandem mass spectrometry. Peptide separation was obtained on a Thermo RSLC Ultimate 3000 ultra-high pressure liquid chromatography system (Thermo Scientific) at 36°C. Solvent A was 0.1% formic acid in water, and solvent B was 0.1% formic acid in 80% acetonitrile. Peptides were loaded onto an Acclaim PepMap 100 RSLC Nanoviper C18 trap column 75  $\mu\text{m} \times 2\text{ cm}$  (Thermo scientific, cat# 164535) at a flow rate of 4  $\mu\text{L}/\text{min}$  and washed with 100% solvent A for 10 min. Then, the peptides were transferred to a Thermo Easy-Spray PepMap RSLC C18 separation column 75  $\mu\text{m} \times 50\text{ cm}$  with 2  $\mu\text{m}$  particles (Thermo Scientific, cat# ES903) and separated at a flow rate of 300 nL/min using a gradient of 9–25% solvent B in 27 min, 25–35% solvent B in 5 min, 35–99% solvent B in 4 min, hold at 99% solvent B for 4 min, from 99 to 9% solvent B in 4 min, hold at 9% solvent B for 16 min. Eluted peptides were sprayed directly into an Orbitrap Fusion Lumos Tribrid mass spectrometer (Thermo Scientific). Data were collected using data-dependent acquisition. A survey full scan MS (from 350 to 1800  $m/z$ ) was acquired in the Orbitrap in positive ion mode, with a resolution of 120,000. The AGC target (Automatic Gain Control for setting the ion population in the Orbitrap before collecting the mass spectrum) was set at  $4 \times 10^5$ , and the ion filling time was set at 100 ms. The 25 most intense ions with charge state of 2–6 were isolated in quadrupole mode, in a 3 s cycle, and fragmented using high-energy collision-induced dissociation with 35% normalized collision energy. Fragment ions were detected in the Orbitrap with a mass resolution of 30,000 at 200  $m/z$ . The AGC target for the mass spectral fragmentation spectrum was set at  $5 \times 10^4$ , ion filling time was set at 60 ms, and dynamic exclusion set for 30 s after 1 time with a 10 ppm mass window. Data were reported in \*.raw format.

Mass spectral data in \*.raw format were converted to \*.mgf with MSConvert (Source Forge/Proteome Wizard) [33]. Candidates for phosphorylated HuBChE peptides were identified by Protein Prospector v 6.4.9 (prospector.ucsf.edu/prospector/mshome.htm) database searches using Batch-Tag Web. The search parameters were as follows: Database was User protein; User Protein Sequence was the FASTA file for HuBChE (accession number P06276); Digest was no enzyme; Missed cleavages were 3; Charge range was positive 2, 3, 4, & 5; Masses were monoisotopic; Precursor Tol was 20 ppm; Frag Tol was 30 ppm; Instrument was ESI Q high res; Constant Mods was none; Variable Mods was oxidation of methionine; User defined modifications were 1) malathion aged, (specificity serine, elemental composition  $\text{PSO}_2\text{CH}_3$ , accurate mass 109.95 Da, mass modification range 109.5 to 110.5 Da); 2) isomalathion aged (specificity serine, elemental composition  $\text{PO}_3\text{CH}_4$ , accurate mass 93.98 Da, mass modification range 93.5 to 94.5 Da); 3) malathion adduct (specificity serine, elemental composition  $\text{PSO}_2\text{C}_2\text{H}_5$ , accurate mass 123.97 Da, mass modification range 123.5 to 124.5 Da); and 4) isomalathion adduct (specificity serine, elemental composition  $\text{PSO}_6\text{C}_9\text{H}_{15}$ , accurate mass 282.03 Da, mass modification range 281.5 to 282.5 Da). Candidates for peptides with serine adducts were chosen by Protein Prospector and were checked by manual evaluation. Accurate monoisotopic masses were calculated from the elemental composition using Scientific Instrument Services Exact Mass Calculator, single isotope version from Adaptas Solutions (Palmer, MA).

### Hydrolysis of malathion by various esterases

Hydrolysis of the ethyl ester bonds in malathion by recombinant human carboxylesterase, pure human plasma butyrylcholinesterase (from Cohn fraction), and recombinant human acetylcholinesterase was followed with time, using an end-point method as described below. The HuBChE reaction consisted of 1.68 mM malathion and 75 unit/ml (1.76  $\mu\text{M}$ ) HuBChE in 1 ml of 20 mM ammonium bicarbonate, in a 15 ml Sarstedt polypropylene tube. The carboxylesterase reaction consisted of 0.27 mM malathion, 0.027 unit/ml rHuCE1 in 1 ml of 20 mM ammonium bicarbonate. The rHuAChE reaction consisted of 0.27 mM malathion, 3.6 unit/ml rHuAChE, in 1 ml 20 mM ammonium bicarbonate. The activities of rHuCE1, HuBChE, and rHuAChE were confirmed before the assays. All reactions were incubated at room temperature in the dark for up to 48 hours.

Reactions were stopped at various timed intervals by adding 3 volumes of acetonitrile, followed by centrifugation at 2600 $\times g$  for 30 minutes to pellet solids. The supernatant was transferred to a 15 ml Pyrex tube, dried in a SpeedVac, redissolved in 700  $\mu\text{L}$  of 20 mM ammonium bicarbonate, and passed through an Ultrafree-MC 0.22  $\mu\text{m}$  Durapore centrifugal

filter (Millipore, cat# UFC30GV0S). Samples were protected from light because malathion alpha monocarboxylic acid appeared to degrade in light in the presence of acetonitrile. Assays were repeated 3-times and average values were used.

### HPLC separation

Filtered samples were loaded onto a Waters 625 HPLC with a Prodigy 5  $\mu$ m ODS column, 11 x 4.6 mm (Phenomenex, cat# D3300-EO) using a 500  $\mu$ l loop and eluted with a 36-minute gradient of 0–60% acetonitrile at 1 ml per minute. Solvent A was water. Solvent B was 100% acetonitrile. Elution of malathion and derivatives was detected by absorbance at 220 nm. Our HPLC procedure was patterned after work by Velkoska-Markovska & Petanovska-Ilievska [34].

Five peaks were detected in the HPLC effluent. Peaks were collected and identified by comparison with the elution of standards: malathion; malathion dicarboxylic acid; isomalathion; malathion beta monocarboxylic acid; and malathion alpha monocarboxylic acid.

### Infusion mass spectral analysis of the hydrolysis products

Corresponding peaks from each time point in the hydrolysis of malathion were combined, dried in a SpeedVac, redissolved in water (to an estimated concentration of about 2 mM), passed through an Ultrafree-MC 0.22  $\mu$ m Durapore centrifugal filter, acidified with 10% formic acid, and infused into an Orbitrap Fusion Lumos mass spectrometer at 5  $\mu$ l/min. Mass range was 150–600 Da. Sheath gas was set to 0 arbitrary units, and the auxiliary gas was set to 7 arbitrary units.

## Results and discussion

### Inhibition of HuBChE by an isomalathion contaminant in malathion

No inhibition of HuBChE activity was observed in the presence of malathion at concentrations below 0.43 mM, which is the solubility limit of malathion in water. At higher concentrations, up to 126 mM, inhibition was detected, but because the concentration of solubilized malathion could not exceed 0.43 mM, that inhibition can best be ascribed to trace amounts of contaminants in the malathion preparation.

Mass spectral analysis of HuBChE peptic-peptides from the malathion-HuBChE reaction showed a peptide with an adduct on the active site serine of HuBChE with an added mass of 94 Da, Fig 2. This species is consistent with an aged adduct from isomalathion. Fig 3 gives the theoretical adduct masses for species from the reactions of malathion and isomalathion with HuBChE. Potential adducts at 110 and 124 Da from malathion were not detected. The added mass of 94 Da is consistent with an isomalathion adduct. Although the same mass could be formed from malaoxon, it could not come from malathion. That the 94 Da adduct is due to isomalathion and not to malaoxon is demonstrated by HPLC separation of malathion hydrolysis products, Fig 4, which shows a small peak at 21.4 minutes, consistent with isomalathion. Under the same conditions, malaoxon elutes at 19.2 minutes.

Reports from the literature on the reaction of isomalathion with human and horse BChE also describe an adduct with an added mass of 94 Da [35,36]. There are two routes in Fig 3 that lead from isomalathion to the 94 Da adduct. They reflect stereoisomers at the phosphorous of isomalathion. The 1R isomer loses a diethyl thiosuccinate moiety to form a 124 Da adduct, which then loses methanethiol via aging to form the 94 Da adduct. The 1S isomer first loses the methanethiol and then loses the diethyl thiosuccinate [36]. The 1R path is 4-to-7 fold faster than the 1S [37].

### Hydrolysis of the ethyl esters of malathion by various esterases

We explored the hydrolysis of malathion by pure recombinant human carboxylesterase, pure plasma-derived human butyrylcholinesterase, and pure recombinant human acetylcholinesterase in 20 mM ammonium carbonate buffer at room temperature. HPLC separated the hydrolysis mixture into five fractions, Fig 4. These fractions were identified as the starting malathion (eluting at 29.4 minutes), malathion alpha monocarboxylic acid (eluting at 7.0 minutes), malathion beta

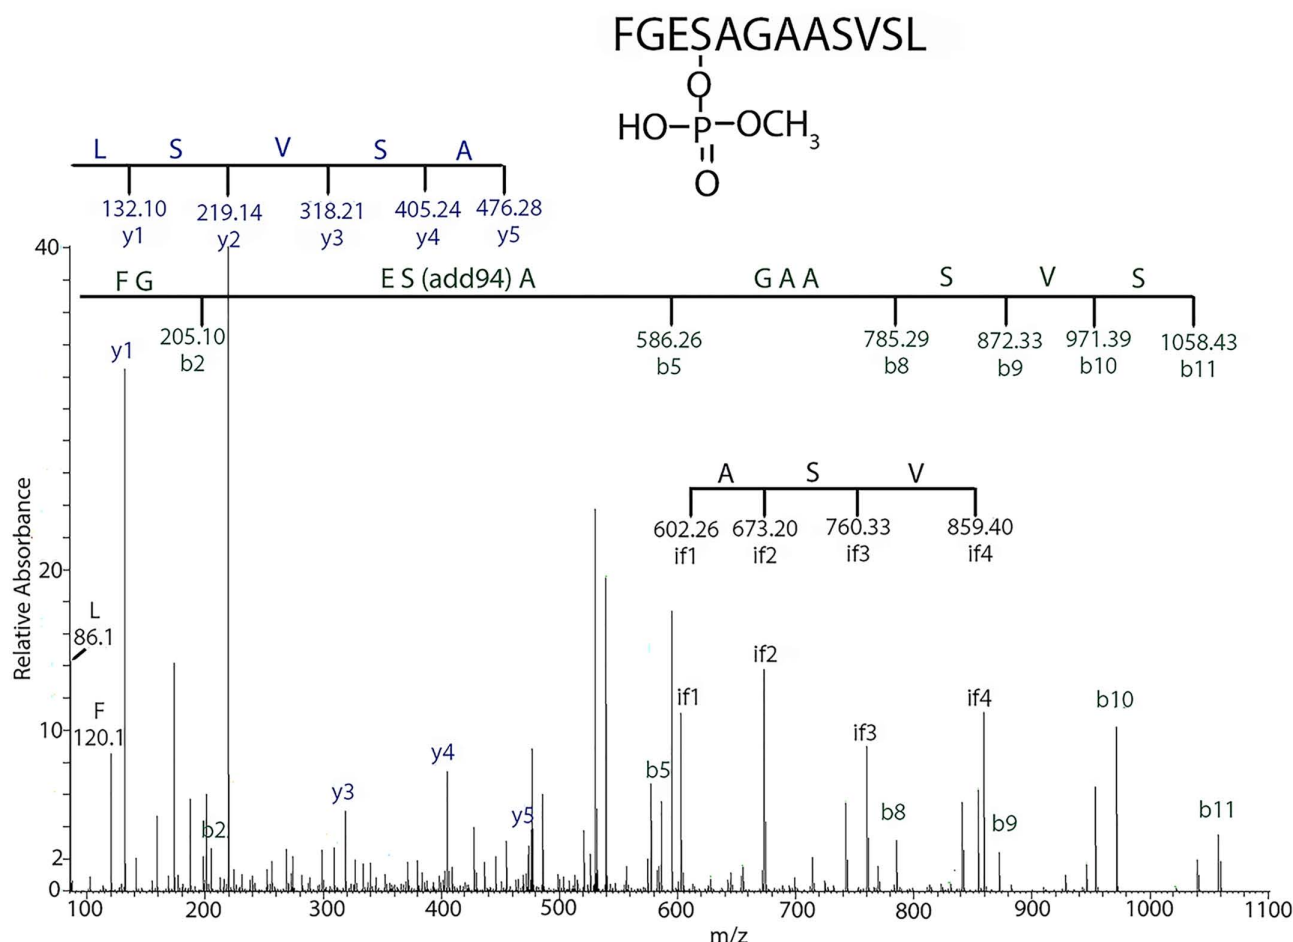

**Fig 2. Tandem mass spectral fragmentation spectrum of the active site peptide of HuBChE, accession # P06276, labeled on the active site serine with a 94 Da mass from isomalathion.** The blue fragments define a y-ion sequence ASVSL. The green fragments define a b-ion sequence FGESAGAASVSL labeled on the first serine by a 94 Da mass that is consistent with (HO)P(O)OCH<sub>3</sub>, an aged fragment from isomalathion. The black sequence is an internal fragment with sequence ASV. The parent ion has a mass of 595.26 m/z in the charge state +2. The 94 Da added mass on the active site serine of HuBChE is consistent with isomalathion, a contaminant in the malathion preparation. The 94 Da adduct cannot come from malathion. See Fig 3 for theoretical adduct masses for a malathion adduct, none of which were observed.

<https://doi.org/10.1371/journal.pone.0335361.g002>

monocarboxylic acid (eluting at 8.0 minutes), malathion dicarboxylic acid (eluting at 1.3 minutes), and isomalathion (eluting at 20.3 minutes), by comparison to pure samples.

Additional confirmation of the identity of the HPLC peaks in Fig 4 was obtained by mass spectral infusion analysis of each HPLC peak. The 29.4-minute fraction contained a prominent mass of 331.00 Da, consistent with +1 mass of malathion. The 20.3-minute fraction also contained a mass of 331.00 Da. The masses of malathion and isomalathion are identical, but this mass is most consistent with isomalathion because elution of isomalathion occurs at 20.3 minutes. The 8.0-minute fraction contained a mass of 303.00 Da consistent with malathion beta monocarboxylic acid. The 7.0-minute fraction also contained a mass at 303.00 Da consistent with malathion alpha monocarboxylic acid. The 1.3-minute fraction contained a mass of 275.10 Da consistent with malathion dicarboxylic acid.

The malathion peak decreased with time of incubation with HuBChE and rHuCE1, but not with rHuAChE. The malathion alpha monocarboxylic acid, malathion beta monocarboxylic acid and malathion dicarboxylic acid peaks increased



# Malathion Isomerization, Adduct Formation, Aging

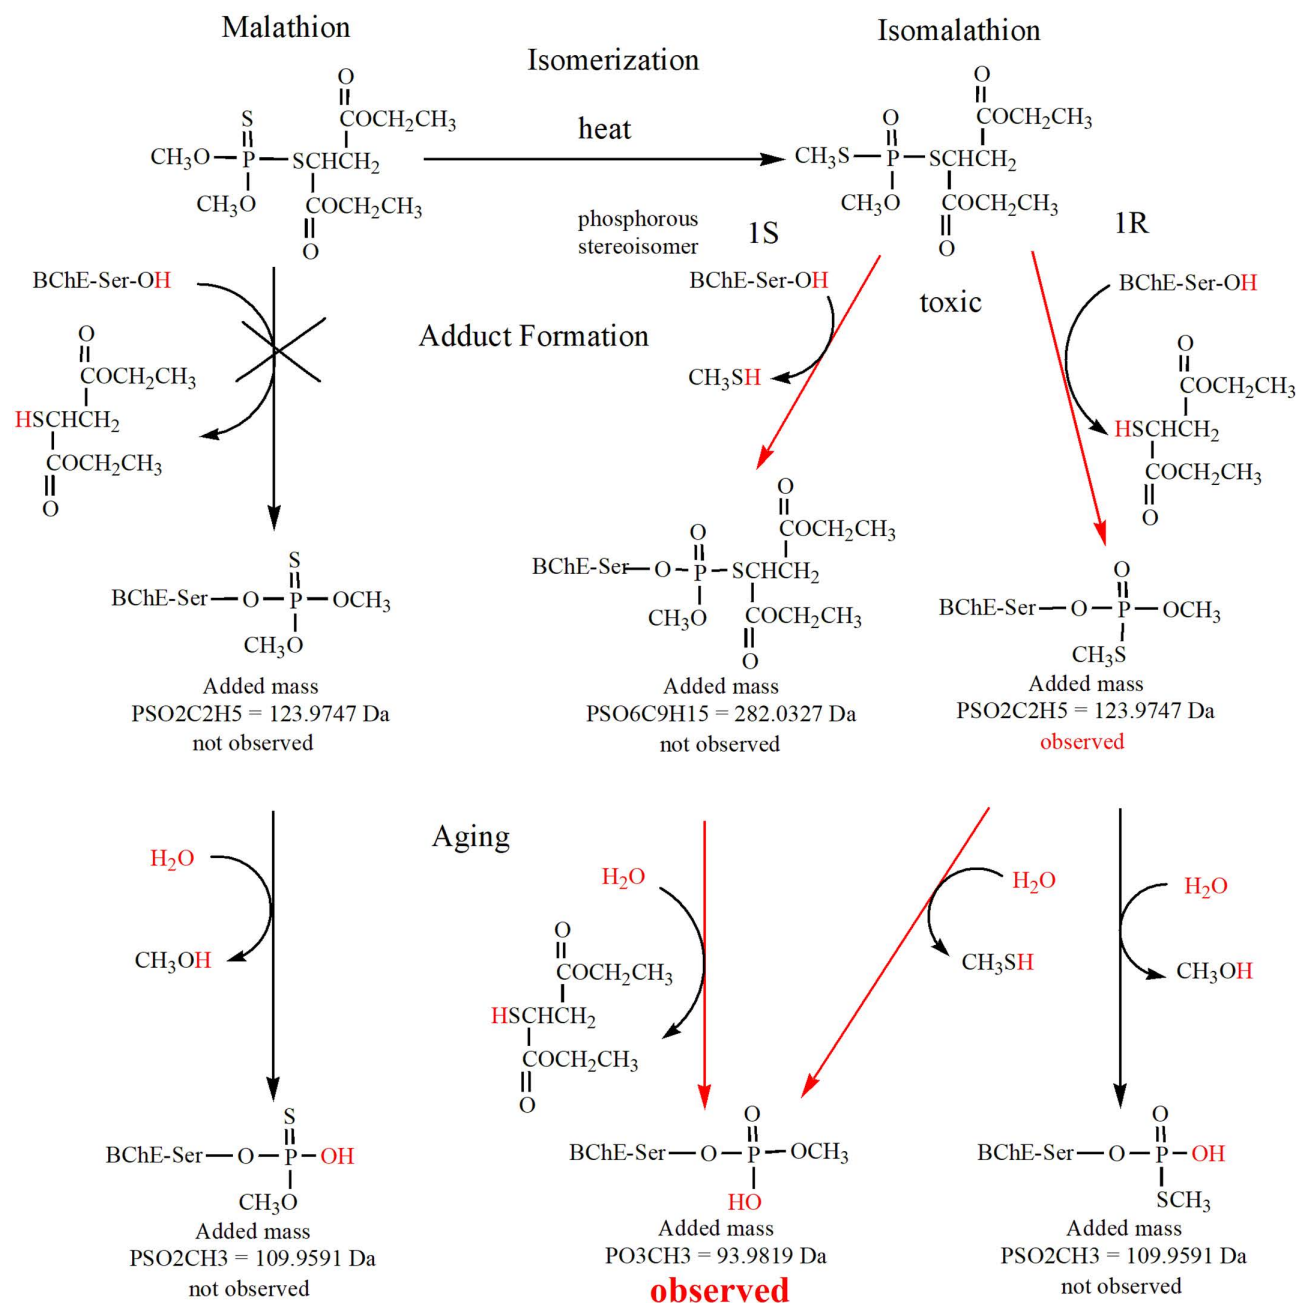

**Fig 3. Malathion isomerization, adduct formation, and aging.** The red atoms indicate the chemistry at each step. The red arrows highlight the 1S and 1R pathways for formation of the 93.98 Da adduct from isomalathion. The X thru the malathion pathway indicates that species in this pathway are not involved in formation of the 94 Da added mass observed for the adduct from the reaction of HuBChE with malathion. The 94 and 124 Da isomalathion adducts were reported for equine butyrylcholinesterase by Doorn et al. [36].

<https://doi.org/10.1371/journal.pone.0335361.g003>

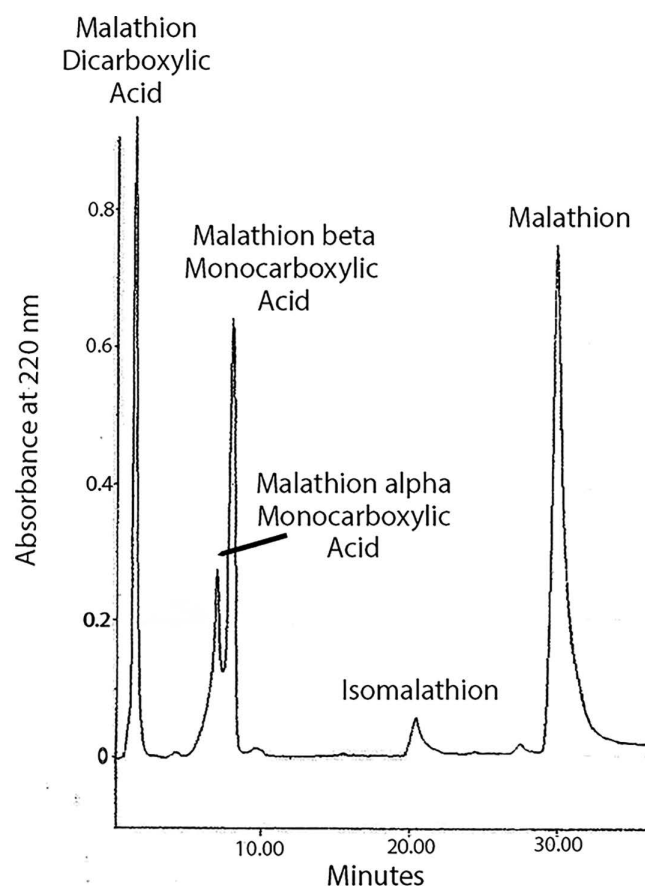

**Fig 4. HPLC profile from hydrolysis of malathion by HuBChE.** The malathion reaction products were separated on a C18 column which was eluted with a 36-minute gradient of 0–60% acetonitrile at 1 ml per minute, where solvent A was water and solvent B was 100% acetonitrile. Elution of malathion and derivatives was detected by absorbance at 220 nm. The identity of the chemical in each peak was determined by mass spectrometry and by comparison to the elution of standards.

<https://doi.org/10.1371/journal.pone.0335361.g004>

with time. The isomalathion peak remained constant. These observations indicate that both ethyl esters of malathion are hydrolyzed by HuBChE and rHuCE1 into the products shown in Fig 4. The ethyl esters of malathion were not hydrolyzed by rHuAChE.

The observed half-lives ( $t_{1/2}$ ) for hydrolysis of the ethyl esters of malathion by HuBChE and rHuCE1 under first-order conditions were 48 hours (2880 minutes) and 5 minutes, respectively (Table 1). Half-life values have traditionally proven to be extremely valuable when comparing the reaction of a compound with various enzymes [38]. If the enzyme concentrations are of the same order and much less than the reactant concentration, there is an inverse proportionality between  $t_{1/2}$  and the bimolecular rate constant  $k_i$  ( $t_{1/2} = \ln 2/k_i$ ). Under these conditions, the  $t_{1/2}$  values are a direct reflection of the relative reactivities of the enzymes, i.e., if the  $t_{1/2}$  for enzyme 1 is 10x smaller than the  $t_{1/2}$  for enzyme 2, then enzyme 1 is 10x more reactive than enzyme 2. In our case, the difference in reactivity of the enzymes is so large (cf. observed  $t_{1/2}$  in Table 1) that a wide range of enzyme concentrations had to be used. Comparison of the relative reactivities requires normalization. Multiplying the  $t_{1/2}$  by the amount of enzyme (in moles) will normalize the relative reactivities. For example, for a given enzyme, doubling the amount of enzyme in the reaction will double the rate, which is equivalent to halving the observed  $t_{1/2}$  value. Multiplying the  $t_{1/2}$  value by the moles of enzyme in each reaction will yield comparable rates. When

**Table 1. Normalization of the hydrolysis of the ethyl esters of malathion t1/2 values.**

| Enzyme  | Reaction Concen<br>units/ml | Specific Activity<br>units/mg | Molecular<br>Weight gm/mole | Reaction<br>Volume ml | Enzyme in<br>reaction moles | Observed<br>t1/2 ± SD minutes | t1/2 x moles<br>of enzyme |
|---------|-----------------------------|-------------------------------|-----------------------------|-----------------------|-----------------------------|-------------------------------|---------------------------|
| rHuCE1  | 0.027                       | 60 <sup>a</sup>               | 59,000 <sup>d</sup>         | 1.05                  | 8.0x10 <sup>-12</sup>       | 6.3 ± 2.4                     | 5.0x10 <sup>-11</sup>     |
| rHuAChE | 3.6                         | 6000 <sup>b</sup>             | 65,000 <sup>b</sup>         | 1.10                  | 1.0x10 <sup>-11</sup>       | 0                             | 0                         |
| HuBChE  | 75                          | 500 <sup>c</sup>              | 85,000 <sup>f</sup>         | 1.00                  | 1.7x10 <sup>-9</sup>        | 2880                          | 5.1x10 <sup>-6</sup>      |

<sup>a</sup>Carboxylesterase specific activity determined with p-nitrophenyl acetate [40]

<sup>b</sup>rHuAChE specific activity determined with acetylthiocholine [41] performed only once

<sup>c</sup>HuBChE specific activity determined with butyrylthiocholine [42] performed only once

<sup>d</sup>Carboxylesterase monomer molecular weight [40]

<sup>e</sup>rHuAChE monomer molecular weight [41]

<sup>f</sup>HuBChE monomer molecular weight [43]

<https://doi.org/10.1371/journal.pone.0335361.t001>

the enzymes are different, the moles of enzyme in the reaction can be obtained by 1) dividing the amount of enzyme in the reaction (units/ml) by the specific activity of the enzyme (units/mg) to obtain mg/ml enzyme, equal to g/L; 2) dividing the g/L by the molecular weight (g/mole) of the enzyme to obtain moles/L; 3) multiplying moles/L by the reaction volume in liters to obtain moles of enzyme in the reaction. Normalization is obtained by multiplying the observed t1/2 by the moles of enzyme in the reaction. The smaller the “t1/2 x moles” number the faster the hydrolysis reaction. These calculations are summarized in Table 1. Hydrolysis of the ethyl ester of malathion by rHuCE1 is 100,000-fold faster (t1/2 x moles = 4x10<sup>-11</sup> min) than hydrolysis by HuBChE (t1/2 x moles = 5.1x10<sup>-6</sup> min).

Malathion hydrolyzes spontaneously in water. The half-life at pH 8.16 is 1.65 days [39]. However, hydrolysis is negligible in 20 mM ammonium bicarbonate over 24 hours.

Pure HuBChE hydrolyzed malathion into the two monocarboxylic acids, a result that expands the finding of Main et al [12] who noted hydrolysis of malathion ethyl esters by human carboxylesterase, but not by human blood, where the plasma contains HuBChE and the red cells contain HuAChE.

## Conclusion

Organophosphate pesticides are not all alike. Malathion is an exceptionally safe organophosphorus pesticide. Low dose environmental exposures to malathion do not cause symptoms of acute organophosphate poisoning. OSHA, in its Occupational Chemical Database on malathion (updated 01/28/2021) gives a permissible exposure level of 15 mg/m<sup>3</sup> for a time weighted average over an 8-hour workday and a 250 mg/m<sup>3</sup> exposure level as being immediately dangerous to life or health.

Toxic organophosphate pesticides inhibit acetylcholinesterase. The consequences of inhibiting acetylcholinesterase are a loss of nerve impulse transmission that ultimately causes muscle paralysis, inhibition of breathing, and death [44].

The mechanism to explain malathion safety is summarized in Fig 5. Unlike other agricultural pesticides malathion does not inhibit acetylcholinesterase, butyrylcholinesterase, or carboxylesterase. The toxic form of malathion is malaoxon. Malaoxon binds to and inactivates acetylcholinesterase, butyrylcholinesterase and carboxylesterase. However, the esterases in our lungs, liver, kidney and intestines prevent malaoxon from being formed when the malathion dose is low. The esterases, in particular carboxylesterase, detoxify malathion by converting malathion to its acids. The acid forms of malathion and malaoxon are not inhibitors of human acetylcholinesterase. The mechanism to explain the low mammalian toxicity of malathion has been convincingly established by others [11,13,45], but is often overlooked. The present report is a reminder that malathion has built-in safety features that are absent in other organophosphorus pesticides.

Comparison of accepted ambient exposure thresholds for malathion, i.e., the OSHA permissible exposure limit (PEL) and the EPA population adjusted reference dose (PAD-RfD) with the observed carboxylesterase hydrolysis parameters

## Malathion and Derivatives

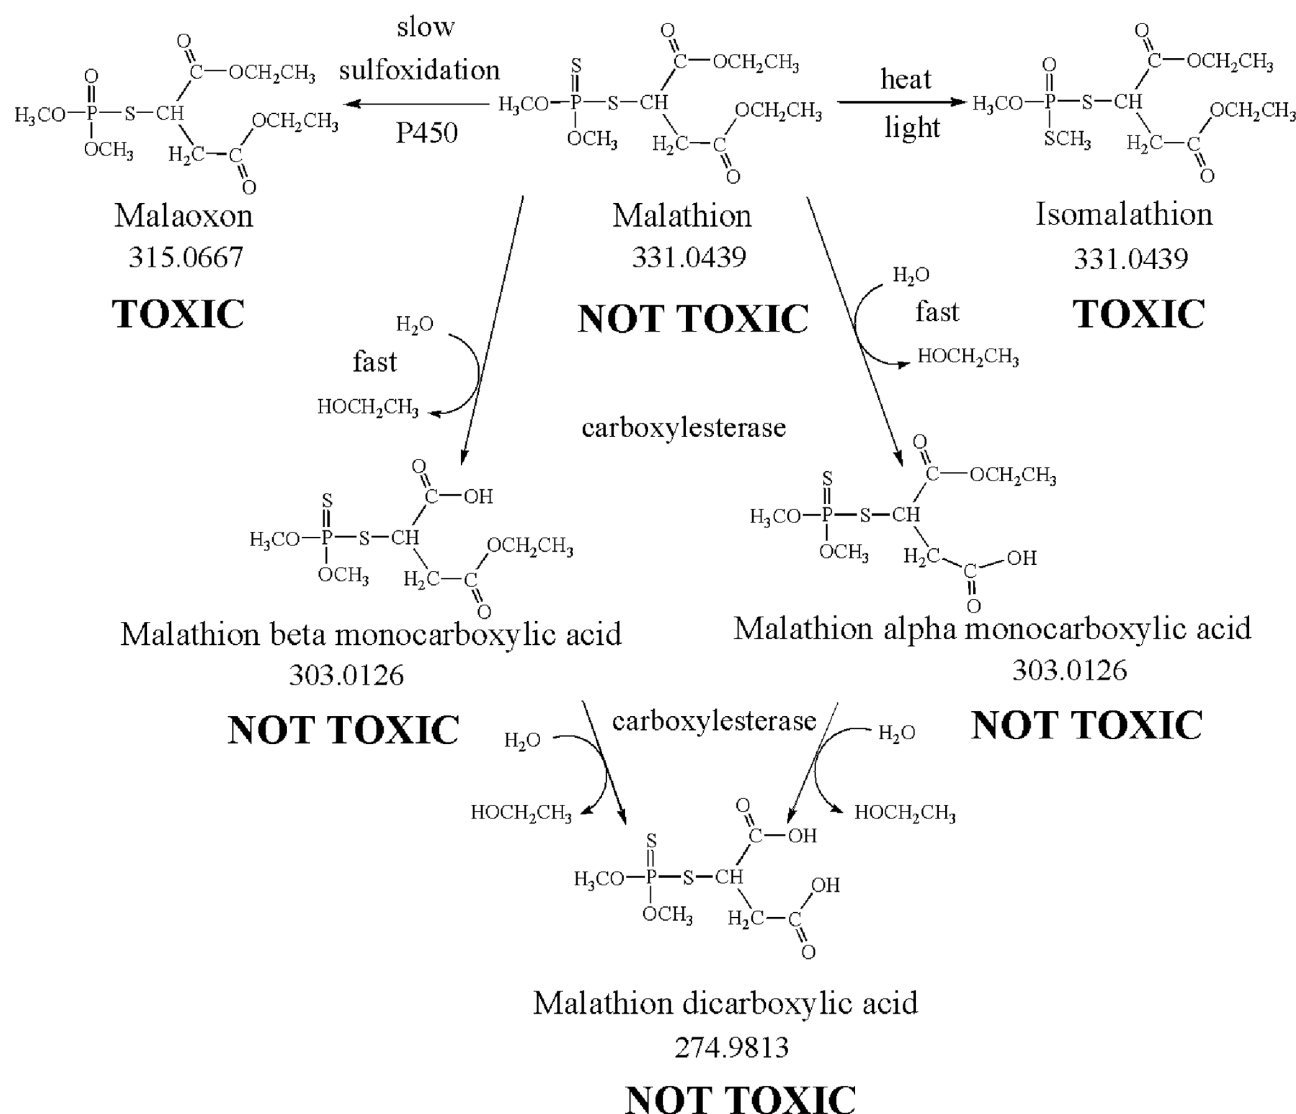

**Fig 5. The malathion metabolite, malaoxon, and the degradation product, isomalathion, are toxic.** Malaoxon and isomalathion inhibit HuAChE, HuBChE, and human carboxylesterase. The de-esterified malathion monocarboxylic and dicarboxylic acids are not toxic. They do not inhibit HuAChE, HuBChE, or human carboxylesterase. Our findings suggest that malathion is safe at low environmental exposures because the rate of formation of the nontoxic metabolites is faster than the rate of formation of the toxic derivatives.

<https://doi.org/10.1371/journal.pone.0335361.g005>

is informative. The OSHA PEL is 15 mg malathion per cubic meter, which means that it is safe for a person to work for 8 hours in a space that contains 15 mg malathion/m<sup>3</sup> of air [46]. The PEL RfD is 0.14 mg/kg/day/person, which means that it is safe for a person to ingest 0.14 mg malathion per kilogram body mass per day [47].

The OSHA and EPA malathion exposure levels are lower than the amount of carboxylesterase 1 in human liver, see Table 2 and associated calculations in the table footnotes for details. From this, one would expect that very little malathion would escape the liver. In addition, the half-life for hydrolysis of malathion by carboxylesterase in the liver is remarkably

**Table 2. Comparison of ambient threshold values for malathion with carboxylesterase hydrolysis rate.**

| OSHA PEL $\mu$ moles/<br>liter air/day <sup>A</sup> | EPA RfD<br>$\mu$ moles/day <sup>B</sup> | Carboxylesterase 1 t1/2 in liver microsomes<br>minutes <sup>C</sup> | Carboxylesterase 1 in liver<br>microsomes $\mu$ moles <sup>C</sup> |
|-----------------------------------------------------|-----------------------------------------|---------------------------------------------------------------------|--------------------------------------------------------------------|
| 0.045                                               | 30                                      | $9 \times 10^{-3}$                                                  | 76                                                                 |

A OSHA PEL conversion to moles malathion

$15 \text{ mg/m}^3/\text{day} \times \text{m}^3/1000 \text{ L} = 15 \times 10^{-2} \text{ mg/L/day} \times 10^{-3} \text{ gm/mg} = 1.5 \times 10^{-5} \text{ gm/L/day}$

$1.5 \times 10^{-5} \text{ gm/L/day} \div 330 \text{ gm/mole (MW of malathion)} = 4.5 \times 10^{-8} \text{ mole/L/day}$

B EPA RfD conversion to moles malathion.

Assume a 70 kg adult.

$0.14 \text{ mg/kg/day} \times 70 \text{ kg} = 9.8 \text{ mg/day} \times 10^{-3} \text{ gm/mg} = 9.8 \times 10^{-3} \text{ gm/day}$

$9.8 \times 10^{-3} \text{ gm/day} \div 330 \text{ gm/mole (MW of malathion)} = 3.0 \times 10^{-5} \text{ mole/day}$

C Calculation of carboxylesterase 1 concentration in human liver microsomes

Assume that malathion is hydrolyzed in the liver by microsomal carboxylesterase 1 (CE).

Adult human liver microsomes contain 1600 pmole CE/mg total liver protein [48].

$1600 \text{ pmole CE/mg microsomal protein} = 1.6 \times 10^{-9} \text{ mole CE/mg microsomal protein}$

$1.6 \times 10^{-9} \text{ mole CE/mg microsomal protein} \times 10^{-3} \text{ gm/mg} = 1.6 \times 10^{-6} \text{ mole CE/gm microsomal protein}$

Adult human liver contains 32 mg microsomal protein/gm liver [49].

$32 \text{ mg microsomal protein/gm liver} \times 10^{-3} \text{ gm/mg} = 3.2 \times 10^{-2} \text{ gm microsomal protein/gm liver}$

$3.2 \times 10^{-2} \text{ gm microsomal protein/gm liver} \times 1.5 \times 10^3 \text{ gm liver} = 48 \text{ gm microsomal protein/liver}$

$48 \text{ gm microsomal protein/liver} \times 1.6 \times 10^{-6} \text{ mole CE/gm microsomal protein} = 7.6 \times 10^{-5} \text{ mole CE/liver}$

Determination of t1/2 for the reaction of CE in liver by comparison of the molar concentration of CE in liver to molar concentration of CE in the assay where the t1/2 value is directly proportional to the CE concentration.

$8.0 \times 10^{-12} \text{ moles CE in reaction} \div 1.05 \times 10^{-3} \text{ L} = 7.6 \times 10^{-9} \text{ M CE in assay}$  yielded a t1/2 = 6.3 minutes (see Table 1)

$7.6 \times 10^{-5} \text{ mole CE/liver} \div 1.5 \text{ L/liver} = 5.1 \times 10^{-5} \text{ M CE in liver}$

$6.3 \text{ minutes} \times 7.6 \times 10^{-9} \text{ M CE in assay} \div 5.1 \times 10^{-5} \text{ M CE in liver} = 9 \times 10^{-3} \text{ min for t1/2 in liver}$

<https://doi.org/10.1371/journal.pone.0335361.t002>

short (0.009 minute) which means that malathion is detoxified very rapidly. Both of these factors re-enforce the proposal that malathion is not toxic to humans. While our findings support a lack of direct toxicity from malathion at low exposures, broader health outcomes require continued surveillance.

High doses of malathion are toxic. Drinking a malathion solution or spilling concentrated malathion on skin results in symptoms of cholinergic toxicity. High doses of malathion include toxic levels of isomalathion and other contaminants. Contaminating levels of isomalathion have been associated with poisoning due to malathion. For example, in 1978, an epidemic of malathion poisoning was correlated with the level of isomalathion in commercial malathion preparations [50]. In addition, isomalathion was isolated from technical malathion preparations and shown to increase upon storage for 3–6 months at 40°C [51]. Isomalathion inhibits the esterases thereby blocking their detoxifying role. Isomalathion inhibition of carboxylesterase is especially dangerous, because carboxylesterase has a major role in detoxifying malathion and malaoxon. In the absence of the detoxifying activity of carboxylesterase, malaoxon accumulates to levels that inhibit acetylcholinesterase. Toxic signs appear only after more than 50% of acetylcholinesterase activity is inhibited in muscle and brain. It is noteworthy to point out that our laboratory-based results do not provide direct evidence on the toxicity of low dose exposure to malathion. On the other hand, epidemiological studies yield correlations between malathion exposure and toxicity, but do not constitute cause-and-effect relationships.

There is no convincing evidence for an association between low dose malathion exposure and cancer. Animal and cultured cell studies showing potential cancer risks from exposure to malathion employed supra-environmental doses. The International Agency for Research on Cancer says that malathion is not classifiable as to its carcinogenicity in humans.

Possible long term or subacute toxic effects cannot be ruled out.



## Acknowledgments

MS data were obtained by the Mass Spectrometry and Proteomics Core Facility at the University of Nebraska Medical Center. The authors acknowledge that Protein Prospector programs are available at no cost (<https://prospector.ucsf.edu/prospector.ucsf.edu>). Protein Prospector was developed in the University of California San Francisco Mass Spectrometry Facility, directed by Dr. Alma Burlingame.

## Author contributions

**Conceptualization:** Oksana Lockridge.

**Formal analysis:** Lawrence M M. Schopfer, Lawrence M. Schopfer.

**Funding acquisition:** Oksana Lockridge.

**Investigation:** Lawrence M M. Schopfer, Lawrence M. Schopfer, Ozden Tacal.

**Supervision:** Oksana Lockridge.

**Writing – original draft:** Lawrence M M. Schopfer, Lawrence M. Schopfer, Patrick Masson, Oksana Lockridge.

**Writing – review & editing:** Lawrence M M. Schopfer, Lawrence M. Schopfer, Ozden Tacal, Patrick Masson, Oksana Lockridge.

## References

- Overstreet J. Malathion interium registration review decision case number 0248. Environ Protect Agen. 2024;Docket EPA-HQ-OPP-2009-0317-0175:18.
- Jensen IM, Whatling P. Malathion: A review of toxicology. In: Krieger RI, editor. *Hayes' Handbook of Pesticide Toxicology*. 3rd edition. New York: Academic Press; 2010. p. 1527–42.
- Feldmann RJ, Maibach HI. Percutaneous penetration of some pesticides and herbicides in man. *Toxicol Appl Pharmacol*. 1974;28(1):126–32. [https://doi.org/10.1016/0041-008x\(74\)90137-9](https://doi.org/10.1016/0041-008x(74)90137-9) PMID: 4853576
- Bouchard M, Gosselin NH, Brunet RC, Samuel O, Dumoulin M-J, Carrier G. A toxicokinetic model of malathion and its metabolites as a tool to assess human exposure and risk through measurements of urinary biomarkers. *Toxicol Sci*. 2003;73(1):182–94. <https://doi.org/10.1093/toxsci/kfg061> PMID: 12657741
- Hayes WJ Jr, Mattson AM, Short JG, Witter RF. Safety of malathion dusting powder for louse control. *Bull World Health Organ*. 1960;22(5):503–14. PMID: 14400336
- Krieger RI, Dinoff TM. Malathion deposition, metabolite clearance, and cholinesterase status of date dusters and harvesters in California. *Arch Environ Contam Toxicol*. 2000;38(4):546–53. <https://doi.org/10.1007/s002449910071> PMID: 10787107
- Wester RC, Maibach HI, Bucks DA, Guy RH. Malathion percutaneous absorption after repeated administration to man. *Toxicol Appl Pharmacol*. 1983;68(1):116–9. [https://doi.org/10.1016/0041-008x\(83\)90360-5](https://doi.org/10.1016/0041-008x(83)90360-5) PMID: 6845371
- Bradway DE, Shafik TM. Malathion exposure studies. Determination of mono- and dicarboxylic acids and alkyl phosphates in urine. *J Agric Food Chem*. 1977;25(6):1342–4. <https://doi.org/10.1021/jf60214a002> PMID: 915135
- Warren M, Spencer HC, Churchill FC, Francois VJ, Hippolyte R, Staiger MA. Assessment of exposure to organophosphate insecticides during spraying in Haiti: monitoring of urinary metabolites and blood cholinesterase levels. *Bull World Health Organ*. 1985;63(2):353–60. PMID: 3874716
- Pluth JM, Nicklas JA, O'Neill JP, Albertini RJ. Increased frequency of specific genomic deletions resulting from in vitro malathion exposure. *Cancer Res*. 1996;56(10):2393–9. PMID: 8625317
- Buratti FM, D'Aniello A, Volpe MT, Meneguz A, Testai E. Malathion bioactivation in the human liver: the contribution of different cytochrome p450 isoforms. *Drug Metab Dispos*. 2005;33(3):295–302. <https://doi.org/10.1124/dmd.104.001693> PMID: 15557345
- Main A, Braid P. Hydrolysis of malathion by ali-esterases in vitro and in vivo. *Biochem J*. 1962;84(2):255–63. <https://doi.org/10.1042/bj0840255>
- Buratti FM, Testai E. Malathion detoxification by human hepatic carboxylesterases and its inhibition by isomalathion and other pesticides. *J Biochem Mol Toxicol*. 2005;19(6):406–14. <https://doi.org/10.1002/jbt.20106> PMID: 16421896
- Seume FW, O'Brien RD. Insecticide Metabolism, Metabolism of Malathion by Rat Tissue Preparations and Its Modification by EPN. *J Agric Food Chem*. 1960;8(1):36–41. <https://doi.org/10.1021/jf60107a009>
- Blondell J, Spann MF. Review of Malathion Incident Reports. Environ Protect Agen. 1998;US EPA Malathion PcCode 057701-122:1-39.

16. Britton W, Piper S, Britt A. Malathion Updated draft human health risk assessment for registration. Environ Protect Agen. 2024;Docket EPA-HQ-OPP-2009-0317-0161:38.
17. Band PR, Abanto Z, Bert J, Lang B, Fang R, Gallagher RP, et al. Prostate cancer risk and exposure to pesticides in British Columbia farmers. *Prostate*. 2011;71(2):168–83. <https://doi.org/10.1002/pros.21232> PMID: 20799287
18. Bonner MR, Coble J, Blair A, Beane Freeman LE, Hoppin JA, Sandler DP, et al. Malathion exposure and the incidence of cancer in the agricultural health study. *Am J Epidemiol*. 2007;166(9):1023–34. <https://doi.org/10.1093/aje/kwm182> PMID: 17720683
19. Engel LS. Pesticide Use and Breast Cancer Risk among Farmers' Wives in the Agricultural Health Study. *Am J Epidemiol*. 2005;161(2):121–35. <https://doi.org/10.1093/aje/kwi022>
20. McDuffie HH, Pahwa P, McLaughlin JR, Spinelli JJ, Fincham S, Dosman JA, et al. Non-Hodgkin's lymphoma and specific pesticide exposures in men: cross-Canada study of pesticides and health. *Cancer Epidemiol Biomarkers Prev*. 2001;10(11):1155–63. PMID: 11700263
21. Lerro CC, Koutros S, Andreotti G, Friesen MC, Alavanja MC, Blair A, et al. Organophosphate insecticide use and cancer incidence among spouses of pesticide applicators in the Agricultural Health Study. *Occup Environ Med*. 2015;72(10):736–44. <https://doi.org/10.1136/oemed-2014-102798> PMID: 26150671
22. Alavanja MCR, Bonner MR. Occupational pesticide exposures and cancer risk: a review. *J Toxicol Environ Health B Crit Rev*. 2012;15(4):238–63. <https://doi.org/10.1080/10937404.2012.632358> PMID: 22571220
23. Réus GZ, Valvassori SS, Nuernberg H, Comim CM, Stringari RB, Padilha PT, et al. DNA damage after acute and chronic treatment with malathion in rats. *J Agric Food Chem*. 2008;56(16):7560–5. <https://doi.org/10.1021/jf800910q> PMID: 18616275
24. Cabello G, Valenzuela M, Vilaxa A, Durán V, Rudolph I, Hrepic N, et al. A rat mammary tumor model induced by the organophosphorous pesticides parathion and malathion, possibly through acetylcholinesterase inhibition. *Environ Health Perspect*. 2001;109(5):471–9. <https://doi.org/10.1289/ehp.01109471> PMID: 11401758
25. Anjitha R, Antony A, Shilpa O, Anupama KP, Mallikarjunaiah S, Gurushankara HP. Malathion induced cancer-linked gene expression in human lymphocytes. *Environ Res*. 2020;182:109131. <https://doi.org/10.1016/j.envres.2020.109131> PMID: 32069766
26. Gwinn MR, Whipkey DL, Tennant LB, Weston A. Differential gene expression in normal human mammary epithelial cells treated with malathion monitored by DNA microarrays. *Environ Health Perspect*. 2005;113(8):1046–51. <https://doi.org/10.1289/ehp.7311> PMID: 16079077
27. Navarrete-Meneses MP, Salas-Labadía C, Sanabrais-Jiménez M, Santana-Hernández J, Serrano-Cuevas A, Juárez-Velázquez R, et al. "Exposure to the insecticides permethrin and malathion induces leukemia and lymphoma-associated gene aberrations in vitro". *Toxicol In Vitro*. 2017;44:17–26. <https://doi.org/10.1016/j.tiv.2017.06.013> PMID: 28624474
28. Schopfer LM, Lockridge O, David E, Hinrichs SH. Purification of human butyrylcholinesterase from frozen Cohn fraction IV-4 by ion exchange and Hupresin affinity chromatography. *PLoS ONE*. 2019;14(1):e0209795. <https://doi.org/10.1371/journal.pone.0209795>
29. Ellman GL, Courtney KD, Andres V Jr, Feather-Stone RM. A new and rapid colorimetric determination of acetylcholinesterase activity. *Biochem Pharmacol*. 1961;7:88–95. [https://doi.org/10.1016/0006-2952\(61\)90145-9](https://doi.org/10.1016/0006-2952(61)90145-9) PMID: 13726518
30. Morton CL, Potter PM. Comparison of *Escherichia coli*, *Saccharomyces cerevisiae*, *Pichia pastoris*, *Spodoptera frugiperda*, and COS7 cells for recombinant gene expression. Application to a rabbit liver carboxylesterase. *Mol Biotechnol*. 2000;16(3):193–202. <https://doi.org/10.1385/MB.16.3:193> PMID: 11252804
31. Dafferner AJ, Schopfer LM, Xiao G, Cashman JR, Yerramalla U, Johnson RC, et al. Immunopurification of Acetylcholinesterase from Red Blood Cells for Detection of Nerve Agent Exposure. *Chem Res Toxicol*. 2017;30(10):1897–910. <https://doi.org/10.1021/acs.chemrestox.7b00209> PMID: 28892361
32. Fidder A, Hulst AG, Noort D, de Ruiter R, van der Schans MJ, Benschop HP, et al. Retrospective detection of exposure to organophosphorus anti-cholinesterases: mass spectrometric analysis of phosphorylated human butyrylcholinesterase. *Chem Res Toxicol*. 2002;15(4):582–90. <https://doi.org/10.1021/tx0101806> PMID: 11952345
33. Chambers MC, Maclean B, Burke R, Amodei D, Ruderman DL, Neumann S, et al. A cross-platform toolkit for mass spectrometry and proteomics. *Nat Biotechnol*. 2012;30(10):918–20. <https://doi.org/10.1038/nbt.2377> PMID: 23051804
34. Velkoska-Markovska L, Petanovska-Ilievska B. Rapid resolution liquid chromatography method for determination of malathion in pesticide formulation. *Acta Chromatog*. 2020;32(4):256–9. <https://doi.org/10.1556/1326.2019.00713>
35. Li H, Schopfer LM, Nachon F, Froment M-T, Masson P, Lockridge O. Aging Pathways for Organophosphate-Inhibited Human Butyrylcholinesterase, Including Novel Pathways for Isomalathion, Resolved by Mass Spectrometry. *Toxicol Sci*. 2007;100(1):136–45. <https://doi.org/10.1093/toxsci/kfm215>
36. Doorn JA, Schall M, Gage DA, Talley TT, Thompson CM, Richardson RJ. Identification of butyrylcholinesterase adducts after inhibition with isomalathion using mass spectrometry: difference in mechanism between (1R)- and (1S)-stereoisomers. *Toxicol Appl Pharmacol*. 2001;176(2):73–80. <https://doi.org/10.1006/taap.2001.9279> PMID: 11601883
37. Doorn JA, Talley TT, Thompson CM, Richardson RJ. Probing the active sites of butyrylcholinesterase and cholesterol esterase with isomalathion: conserved stereoselective inactivation of serine hydrolases structurally related to acetylcholinesterase. *Chem Res Toxicol*. 2001;14(7):807–13. <https://doi.org/10.1021/tx015501s> PMID: 11453726
38. Main AR. Mode of action of anticholinesterases. *Pharmac Ther*. 1979;6:579–628.

39. Wang T. Assimilation of malathion in the Indian River estuary, Florida. *Bull Environ Contam Toxicol*. 1991;47(2):238–43. <https://doi.org/10.1007/BF01688646> PMID: [1912700](#)
40. Kroetz DL, McBride OW, Gonzalez FJ. Glycosylation-dependent activity of baculovirus-expressed human liver carboxylesterases: cDNA cloning and characterization of two highly similar enzyme forms. *Biochemistry*. 1993;32(43):11606–17. <https://doi.org/10.1021/bi00094a018> PMID: [8218228](#)
41. Kronman C, Velan B, Gozes Y, Leitner M, Flashner Y, Lazar A, et al. Production and secretion of high levels of recombinant human acetylcholinesterase in cultured cell lines: microheterogeneity of the catalytic subunit. *Gene*. 1992;121(2):295–304. [https://doi.org/10.1016/0378-1119\(92\)90134-b](https://doi.org/10.1016/0378-1119(92)90134-b) PMID: [1446827](#)
42. M. Schopfer L, David E, Hinrichs SH, Lockridge O. Human butyrylcholinesterase in Cohn fraction IV-4 purified in a single chromatography step on Hupresin. *PLoS ONE*. 2023;18(1):e0280380. <https://doi.org/10.1371/journal.pone.0280380>
43. Lockridge O, Masson P. Pesticides and susceptible populations: people with butyrylcholinesterase genetic variants may be at risk. *Neurotoxicology*. 2000;21(1–2):113–26. PMID: [10794391](#)
44. Millard CB, Broomfield CA. Anticholinesterases: medical applications of neurochemical principles. *J Neurochem*. 1995;64(5):1909–18. <https://doi.org/10.1046/j.1471-4159.1995.64051909.x> PMID: [7722478](#)
45. Dauterman WC, Main AR. Relationship between acute toxicity and in vitro inhibition and hydrolysis of a series of carbalkoxy homologs of malathion. *Toxicol Appl Pharmacol*. 1966;9(2):408–18. [https://doi.org/10.1016/0041-008x\(66\)90137-2](https://doi.org/10.1016/0041-008x(66)90137-2) PMID: [5969424](#)
46. Mackinson FN, Shincoff RS, Partridge LJ. Occupational health guidelines for chemical hazards. 1981;NIOSH/OSHA 81-123:20.
47. Keigwin RP. Reregistration eligibility decision for malathion. 2009;EPA HQ-OPP 2004-0348-0057 revision. 2009:18.
48. Boberg M, Vrana M, Mehrotra A, Pearce RE, Gaedigk A, Bhatt DK, et al. Age-Dependent Absolute Abundance of Hepatic Carboxylesterases (CES1 and CES2) by LC-MS/MS Proteomics: Application to PBPK Modeling of Oseltamivir In Vivo Pharmacokinetics in Infants. *Drug Metab Dispos*. 2017;45(2):216–23. <https://doi.org/10.1124/dmd.116.072652> PMID: [27895113](#)
49. Leeder JS, Dinh JC, Gaedigk A, Staggs VS, Prasad B, Pearce RE. Ontogeny of Scaling Factors for Pediatric Physiology-Based Pharmacokinetic Modeling and Simulation: Microsomal Protein Per Gram of Liver. *Drug Metab Dispos*. 2022;50(1):24–32. <https://doi.org/10.1124/dmd.121.000623> PMID: [34686522](#)
50. Baker EL Jr, Warren M, Zack M, Dobbin RD, Miles JW, Miller S, et al. Epidemic malathion poisoning in Pakistan malaria workers. *Lancet*. 1978;1(8054):31–4. [https://doi.org/10.1016/s0140-6736\(78\)90375-6](https://doi.org/10.1016/s0140-6736(78)90375-6) PMID: [74508](#)
51. Umetsu N, Grose FH, Allahyari R, Abu-El-Haj S, Fukuto TR. Effect of impurities on the mammalian toxicity of technical malathion and acephate. *J Agric Food Chem*. 1977;25(4):946–52. <https://doi.org/10.1021/jf60212a008> PMID: [881519](#)
